# Supplementary material
Source: ML conference proceedings conference paper supplement (https://openaccess.thecvf.com/content/CVPR2026/html/Zhao_FedSST_Rethinking_Fair_CVPR_2026_paper.html)
Supplement: Supplementary file 1 [file Zhao_FedSST_Rethinking_Fair_CVPR_2026_supplemental.pdf]

## A. Probe Parameter Sensitivity Analysis

To validate the robustness of  $S_{st}$  to probe graph design, we vary key CSBM parameters on the SM setting. Table 1 shows that AVG and STD remain highly stable across all variations (within 1.0 point), and the Kendall’s  $\tau$  ranking correlation consistently exceeds 0.80, confirming that the relative structural ordering of clients is robust to probe design. We further note that  $S_{st}$  reflects the GNN’s learned representation geometry rather than the probe’s specific topology; as long as the probe provides sufficient structural diversity for the GNN to express its preferences, the resulting rankings remain consistent.

Table 1. Probe parameter sensitivity (SM setting).

| Param          | Values      |                    |             |             | Kendall’s $\tau$ |
|----------------|-------------|--------------------|-------------|-------------|------------------|
| Homophily      | 0.65        | <b>0.75</b>        | 0.85        | –           | $0.82 \pm 0.07$  |
| <i>AVG/STD</i> | 81.78/10.71 | <b>82.37/10.32</b> | 82.49/10.44 | –           | –                |
| Node count     | 10          | <b>20</b>          | 40          | –           | $0.87 \pm 0.08$  |
| <i>AVG/STD</i> | 81.46/10.84 | <b>82.37/10.32</b> | 82.31/10.19 | –           | –                |
| Avg degree     | 2           | <b>3</b>           | 4           | 5           | $0.89 \pm 0.07$  |
| <i>AVG/STD</i> | 81.87/10.63 | <b>82.37/10.32</b> | 82.68/10.31 | 81.93/10.58 | –                |
| Feature dim    | 64          | <b>128</b>         | 256         | 512         | $0.91 \pm 0.06$  |
| <i>AVG/STD</i> | 81.94/10.56 | <b>82.37/10.32</b> | 82.63/10.44 | 82.18/10.47 | –                |

Default in **bold**.  $\tau$  = mean pairwise ranking correlation.
